# Supplementary material for: Adequacy of Serial Self-performed SARS-CoV-2 Rapid Antigen Detection Testing for Longitudinal Mass Screening in the Workplace
Source: PubMed Central journal article supplement (PMC9077488; doi:10.1001/jamanetworkopen.2022.10559), 2022-05-06
Supplement: jamanetwopen-e2210559-s001.pdf [file jamanetwopen-e2210559-s001.pdf]

## Supplemental Online Content

Papenburg J, Campbell JR, Caya C, et al. Adequacy of serial self-performed SARS-CoV-2 rapid antigen detection testing for longitudinal mass screening in the workplace. *JAMA Netw Open*. 2022;5(5):e2210559. doi:10.1001/jamanetworkopen.2022.10559

**eFigure 1.** Serial Dilutions of the Positive Control Reagent and Corresponding Color Scale

**eFigure 2.** Manufacturer's Quick Reference Guide

**eFigure 3.** Modified Intervention Instructions

**eTable.** Instruction Type Used at Self-testing Visits 1 and 2

This supplemental material has been provided by the authors to give readers additional information about their work.

**eFigure 1.** Serial Dilutions of the Positive Control Reagent and Corresponding Color Scale

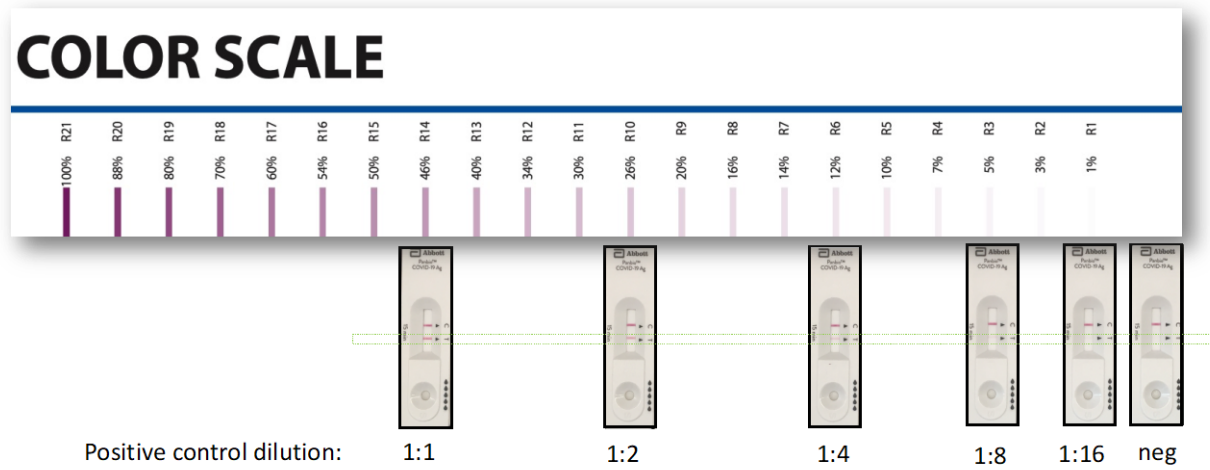

Alignment of the positive tests used to generate the evaluation panel in the present study, against a standard colour scale. The rapid diagnostic test tested span a broad range of possible signal intensities of the test line. The test line is shown in the dashed rectangle.

eFigure 2. Manufacturer's Quick Reference Guide



**COVID-19 Ag RAPID TEST DEVICE**  
(NASAL)

QUICK REFERENCE GUIDE  
REF 41FK11/41FK21

---

**DE**  
Kurzanleitung  
(NASAL)  
Technischer Support:  
Abbott.com/POCT

**ES**  
Guía de referencia rápida  
(NASAL)  
Asistencia técnica:  
Abbott.com/POCT

**FR**  
Guide de référence rapide  
(Prélèvement Nasal)  
Support Technique ;  
Abbott.com/POCT

**IT**  
Guida Rapida di Riferimento  
(NASALE)  
Supporto Tecnico  
Abbott.com/POCT

**PT**  
Guia de referência rápida  
(NASAL)  
Suporte técnico:  
Abbott.com/POCT

**RU**  
Краткое руководство  
(назальный тампон)  
Техническая поддержка:  
Abbott.com/POCT



**TECHNICAL SUPPORT: ABBOTT.COM/POCT**

© 2020 Abbott. All rights reserved. All trademarks referenced are trademarks of either the Abbott group of companies or their respective owners.

41FK11/41FK21-07-QRG-A1

eFigure 3. Modified Intervention Instructions

### Modified Quick Reference Guide - Panbio™ COVID-19 Ag Rapid Test Device

**1** Organize the material you will need

**2**

- Hold the bottle with liquid in it upside down
- Fill the empty tube with buffer liquid to the Fill-line
- **Only add EXACTLY the amount needed to reach the Fill-line**

**3**

**4**

Rub the swab along the walls of each nostril at least 5 times

**5**

- Place the swab in the liquid (make sure it is completely covered by liquid)
- **Swirl the swab firmly inside the tube at least 5 times**
- Squeeze the swab and break off the stick like in the drawing

**6**

- Hold the tube vertically
- Place **EXACTLY 5 drops** into the round well

**7**

- Start a timer
- **Read the test at 15 minutes**
- DO NOT read the test after 20 minutes

**HOW TO READ THE TEST**

**1. Is the test INVALID?**

If the control line (C) is not visible after performing the test, the result is invalid.

**2. Is the test POSITIVE?**

- The presence of the test line (T) and the control line (C), indicates a positive result.
- Seeing ANY visible test line (T), **NO MATTER HOW FAINT**, indicates a positive result.

**3. Is the test NEGATIVE?**

The presence of only the control line (C) and no test line (T) indicates a negative result.

examples

|          |   |   |
|----------|---|---|
| Invalid  | C | T |
| Invalid  | C | T |
| Positive | ↓ | ↓ |
| Positive | C | T |
| Positive | ↓ | ↓ |
| Positive | C | T |
| Negative | ↓ |   |
| Negative | C | T |

Mod QR Panbio instructions\_ENG v1 20210903

**eTable. Instruction Type Used at Self-testing Visits 1 and 2**

|                                     | <b>Self-testing visit 1<br/>n=278</b> | <b>Self-testing visit 2<br/>n=173</b> | <b>Total<br/>n=451</b> |
|-------------------------------------|---------------------------------------|---------------------------------------|------------------------|
| Manufacturer's instructions used    | 163                                   | 90                                    | 253                    |
| Modified Quick Reference Guide used | 115                                   | 83                                    | 198                    |

The modified quick reference guide was implemented as of Sept 13, 2021.
